# Supplementary figures and images for: Growth of the aortic root in children and young adults with Marfan syndrome
Source: HighWire-hosted journal article supplement (doi:10.1136/openhrt-2022-002097), 2022-12-01

Supplemental material placed on this supplemental material which has been Open Access

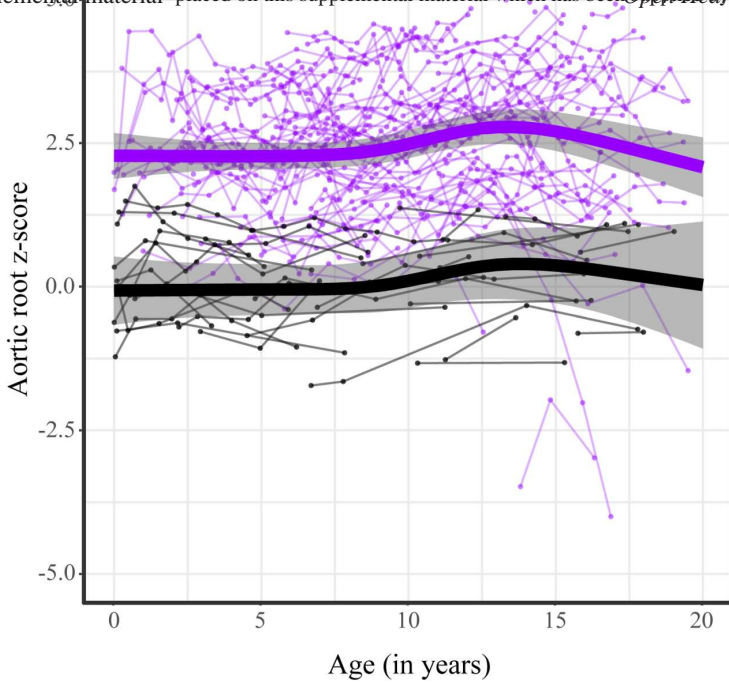

Supplement: openhrt-2022-002097supp001_data_supplement.pdf [file openhrt-2022-002097supp001_data_supplement.pdf]
